# Supplementary material
Source: PubMed Central journal article supplement (PMC9922544)
Supplement: NIHMS1865170-supplement-2.pdf [file NIHMS1865170-supplement-2.pdf]

Figure S1 (related to Figure 1). Intestinal epithelial *Vil*<sup>CreER</sup> and ISC specific *Lgr5*<sup>CreER-GFP</sup> alleles drive specific deletion of *Dlg1* in epithelium.

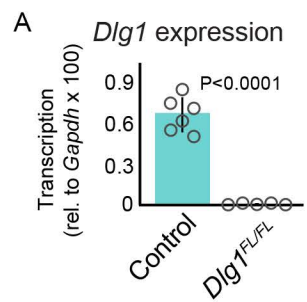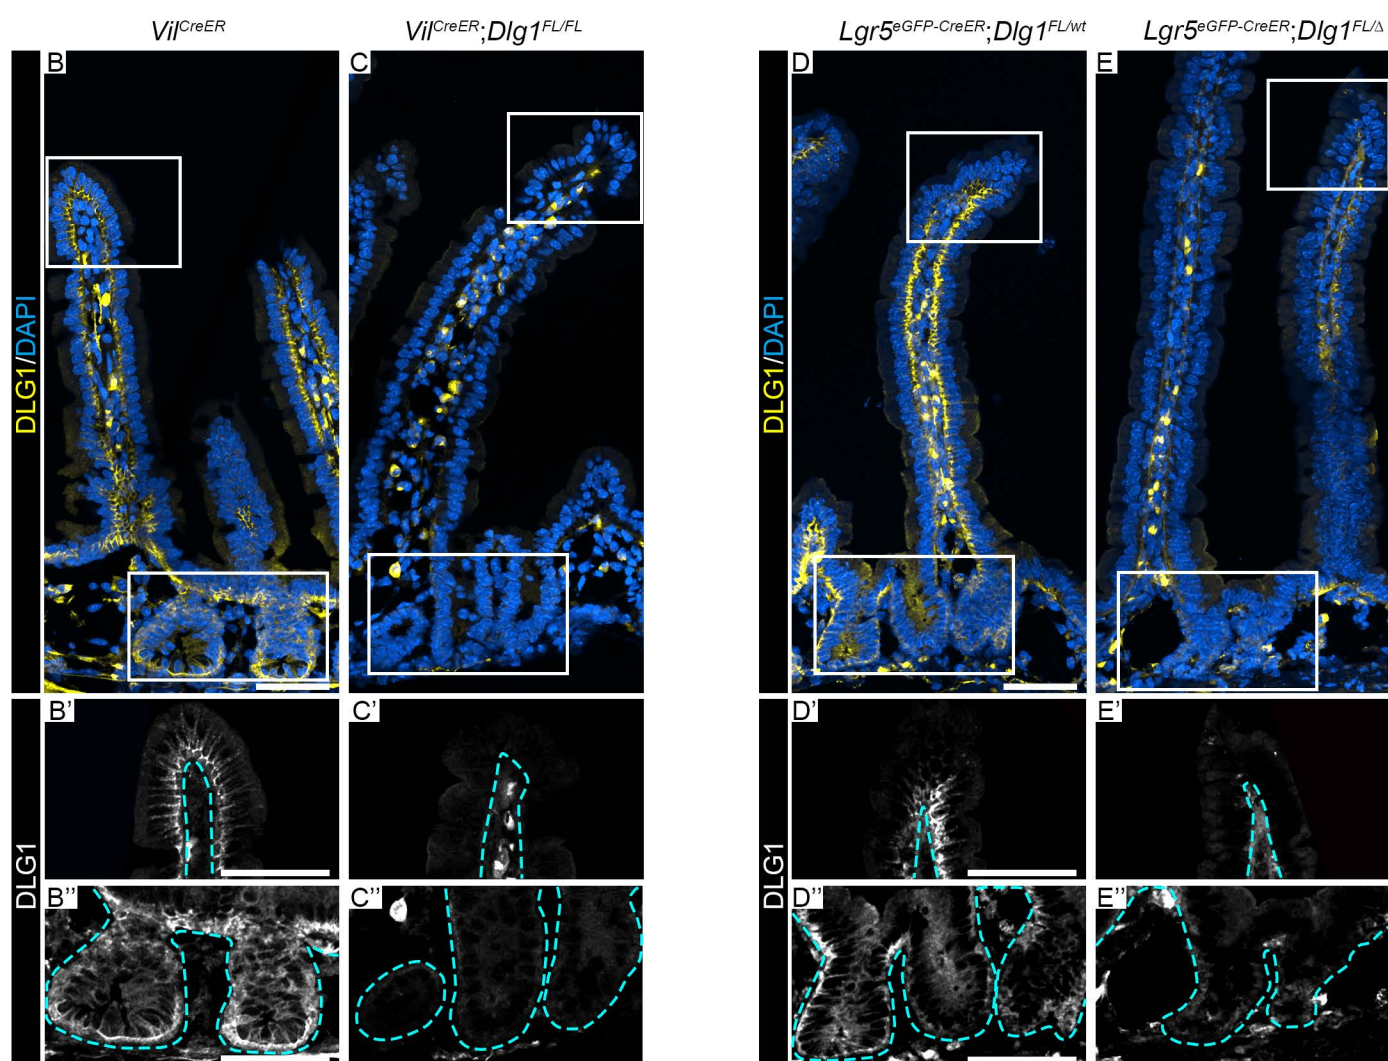

**Figure S1 (related to Figure 1). Intestinal epithelial *Vil*<sup>CreER</sup> and ISC specific *Lgr5*<sup>CreER-GFP</sup> alleles drive specific deletion of *Dlg1* in epithelium.** Mice were injected with one dose of TAM, and the small intestinal epithelium was analyzed 7 days later. **(A)** Transcription levels of *Dlg1* were analyzed by qPCR on FACS-sorted intestinal epithelial cells (DAPI<sup>-</sup>/CD45<sup>-</sup>/EpCAM<sup>+</sup>) isolated from control and DLG1<sup>-</sup> mice. N = 6 mice per condition, mean ± SD, unpaired t test with Welch's correction. **(B-E)** Immunofluorescence images of anti-Dlg1. **(B'-E')** Higher magnification of villus tip of the boxed area in (B-E). **(B''-E'')** Higher magnification of crypt region of the boxed area in (A-D). Dash line indicates the epithelial basement membrane. Scale bars = 50 μm.

**Figure S2 (related to Figure 2). Measurements of trametinib-induced Wnt signaling activation in intestinal stem cells and rotavirus shedding in stool.**

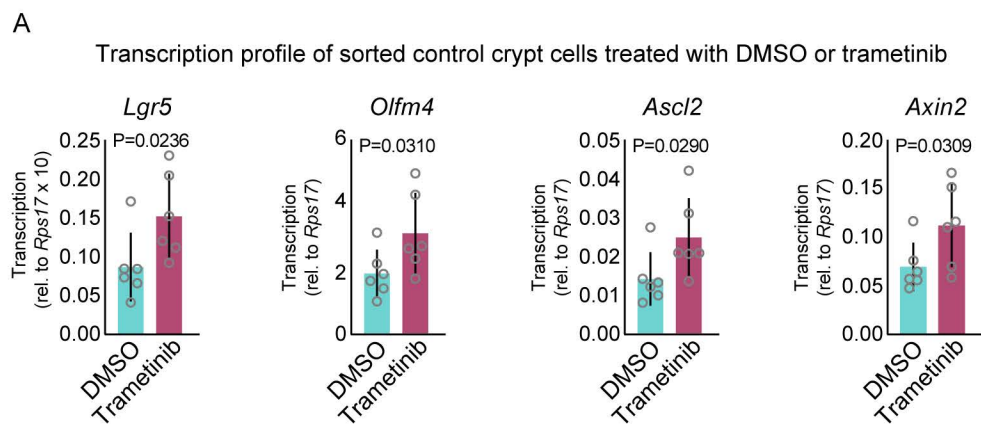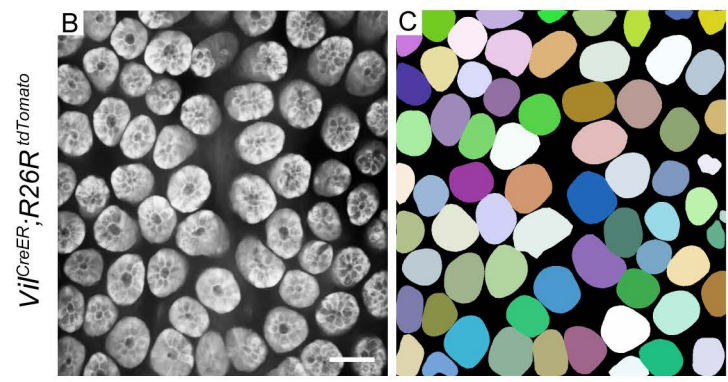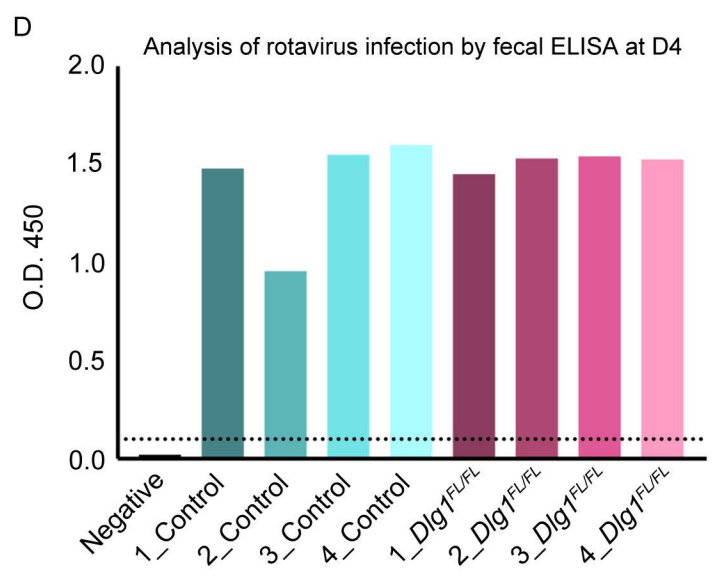

**Figure S2 (related to Figure 2). Quantification of trametinib-induced Wnt signaling activation in intestinal stem cells and rotavirus shedding in stool. (A)** Wnt target genes analyzed by qPCR on FACS-sorted live intestinal crypt cells (DAPI<sup>-</sup>/EpCAM<sup>+</sup>/CD44<sup>+</sup>) from control mice treated with DMSO or trametinib. N = 6 mice per condition, mean ± SD, unpaired t test with Welch's correction. **(B)** Example of bottom view image of tdTomato expressed throughout the intestinal epithelium. **(C)** Pseudocoloring of crypt bottoms (B) for visualization. Images were used for crypt area quantification (see Fig. 2P and g). **(D)** Quantification of Rotavirus viral load using ELISA colorimetric assay. N = 4 mice per condition.

**Figure S3 (related to Figure 3). DLG1<sup>-</sup> ISCs are lost under high levels of WNT3A.**

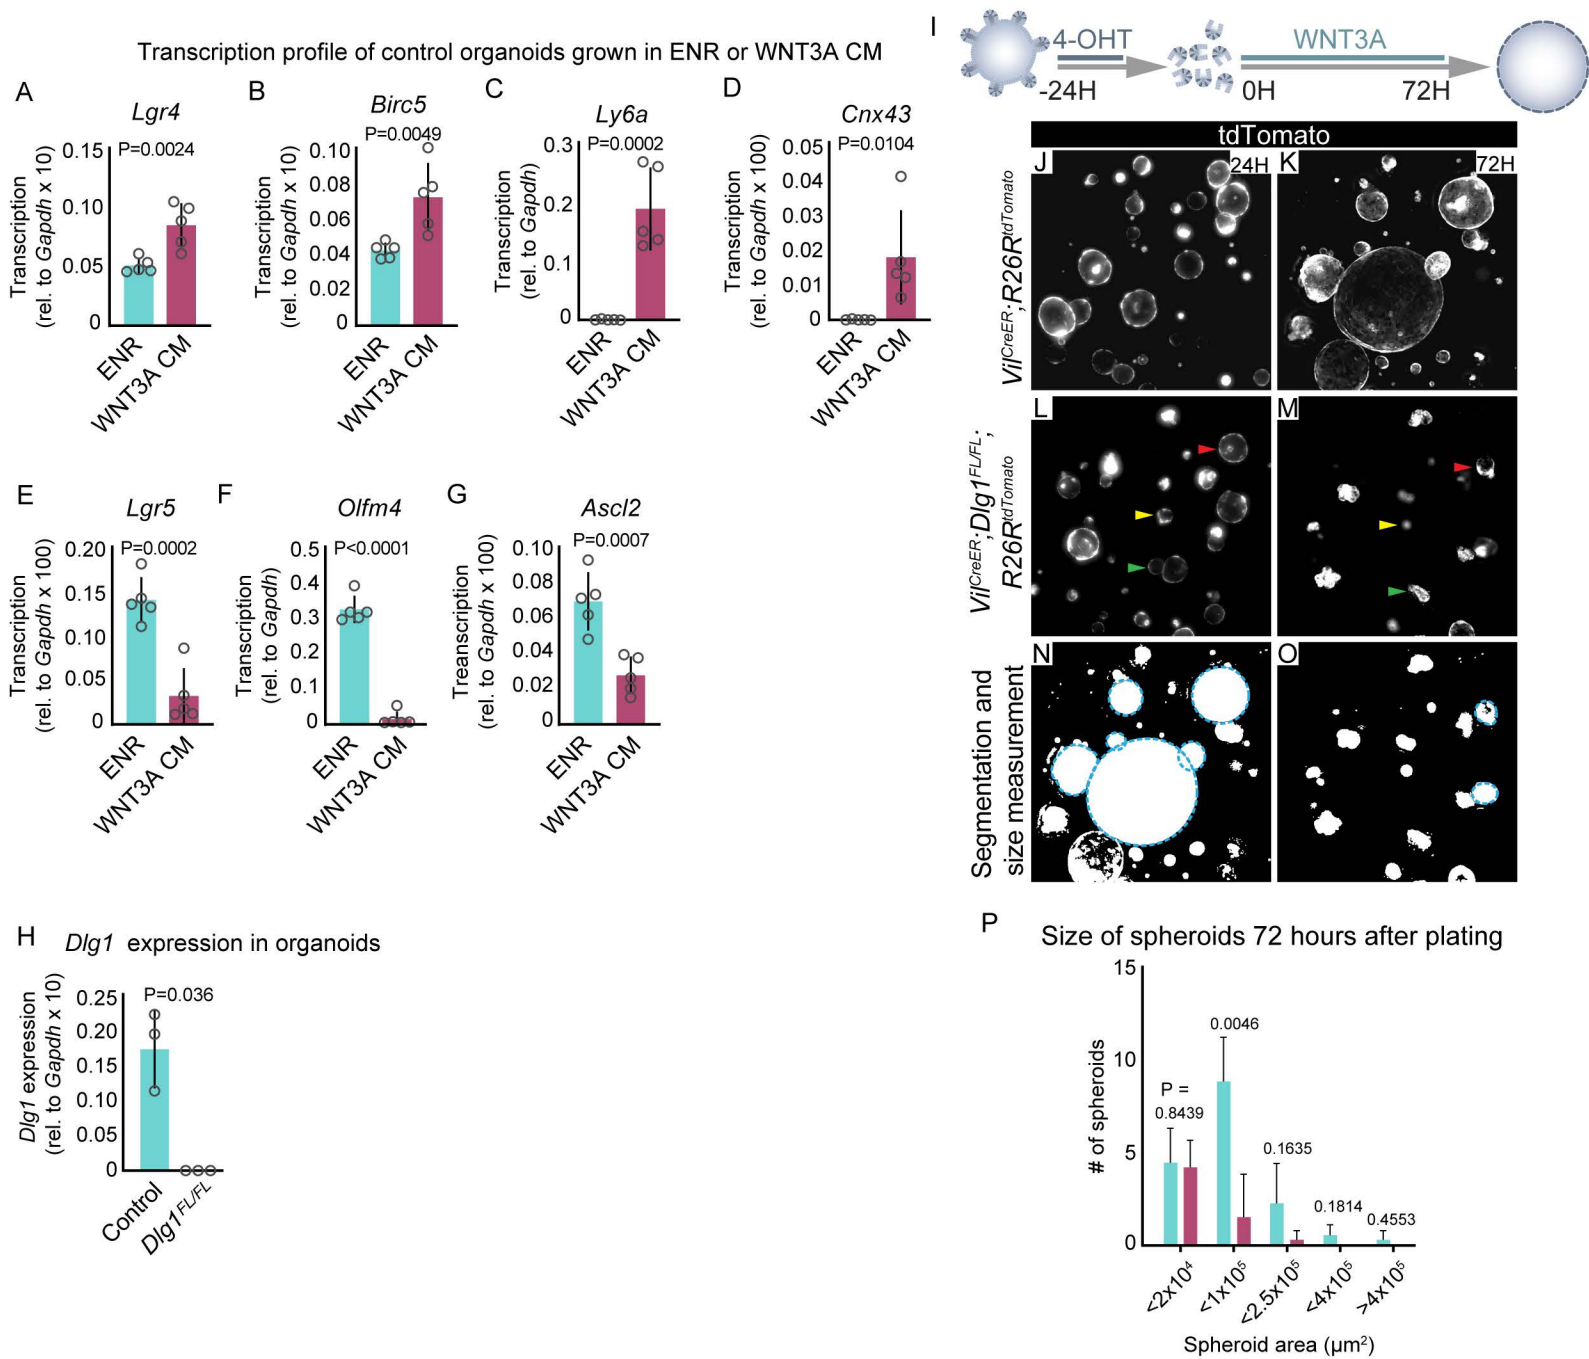

**Figure S3 (related to Figure 3). DLG1<sup>-</sup> ISCs are lost under high levels of WNT3A. (A-G)** Wnt target genes analyzed by qPCR on FACS-sorted live (DAPI<sup>-</sup>) organoids established from control mice and grown in complete ENR medium or in ENR supplemented with 50% WNT3A CM. N = 4 organoid lines per condition, mean  $\pm$  SD, unpaired t test with Welch's correction. **(H)** Transcription levels of *Dlg1* analyzed by qPCR on FACS-sorted organoid live cells (DAPI<sup>-</sup>). N = 3 organoid lines per condition, mean  $\pm$  SD, unpaired t test with Welch's correction. **(I)** Experimental schematic for analyzing ISCs response to increased WNT3A levels. Control and DLG1<sup>-</sup> organoids were treated with 4-OHT prior mechanical passaging, crypts were plated into a Matrigel droplet and overlaid with ENR medium containing 200 ng/ml WNT3A. **(J-M)** 3D rendered Z-stack projections of spheroids at 24 (**J and L**) or 72 (**K and M**) hours after plating. Scale bar = 500  $\mu$ m. **(N and O)** Segmentation of Z-stack projections of spheroids from (K and M). Blue circles indicate the organoid perimeter used for measuring the area. **(P)** Quantification of spheroid growth binned according to size at 72 hours after plating. N = 3 x 20 top sized organoids per condition, mean  $\pm$  SD, unpaired t test with Welch's correction.

**Figure S4 (related to Figure 3). DLG1<sup>-</sup> ISCs are lost in increased levels of WNT3A and mesenchymal WNT, while their capacity to grow remains preserved in non-canonical WNT5A.**

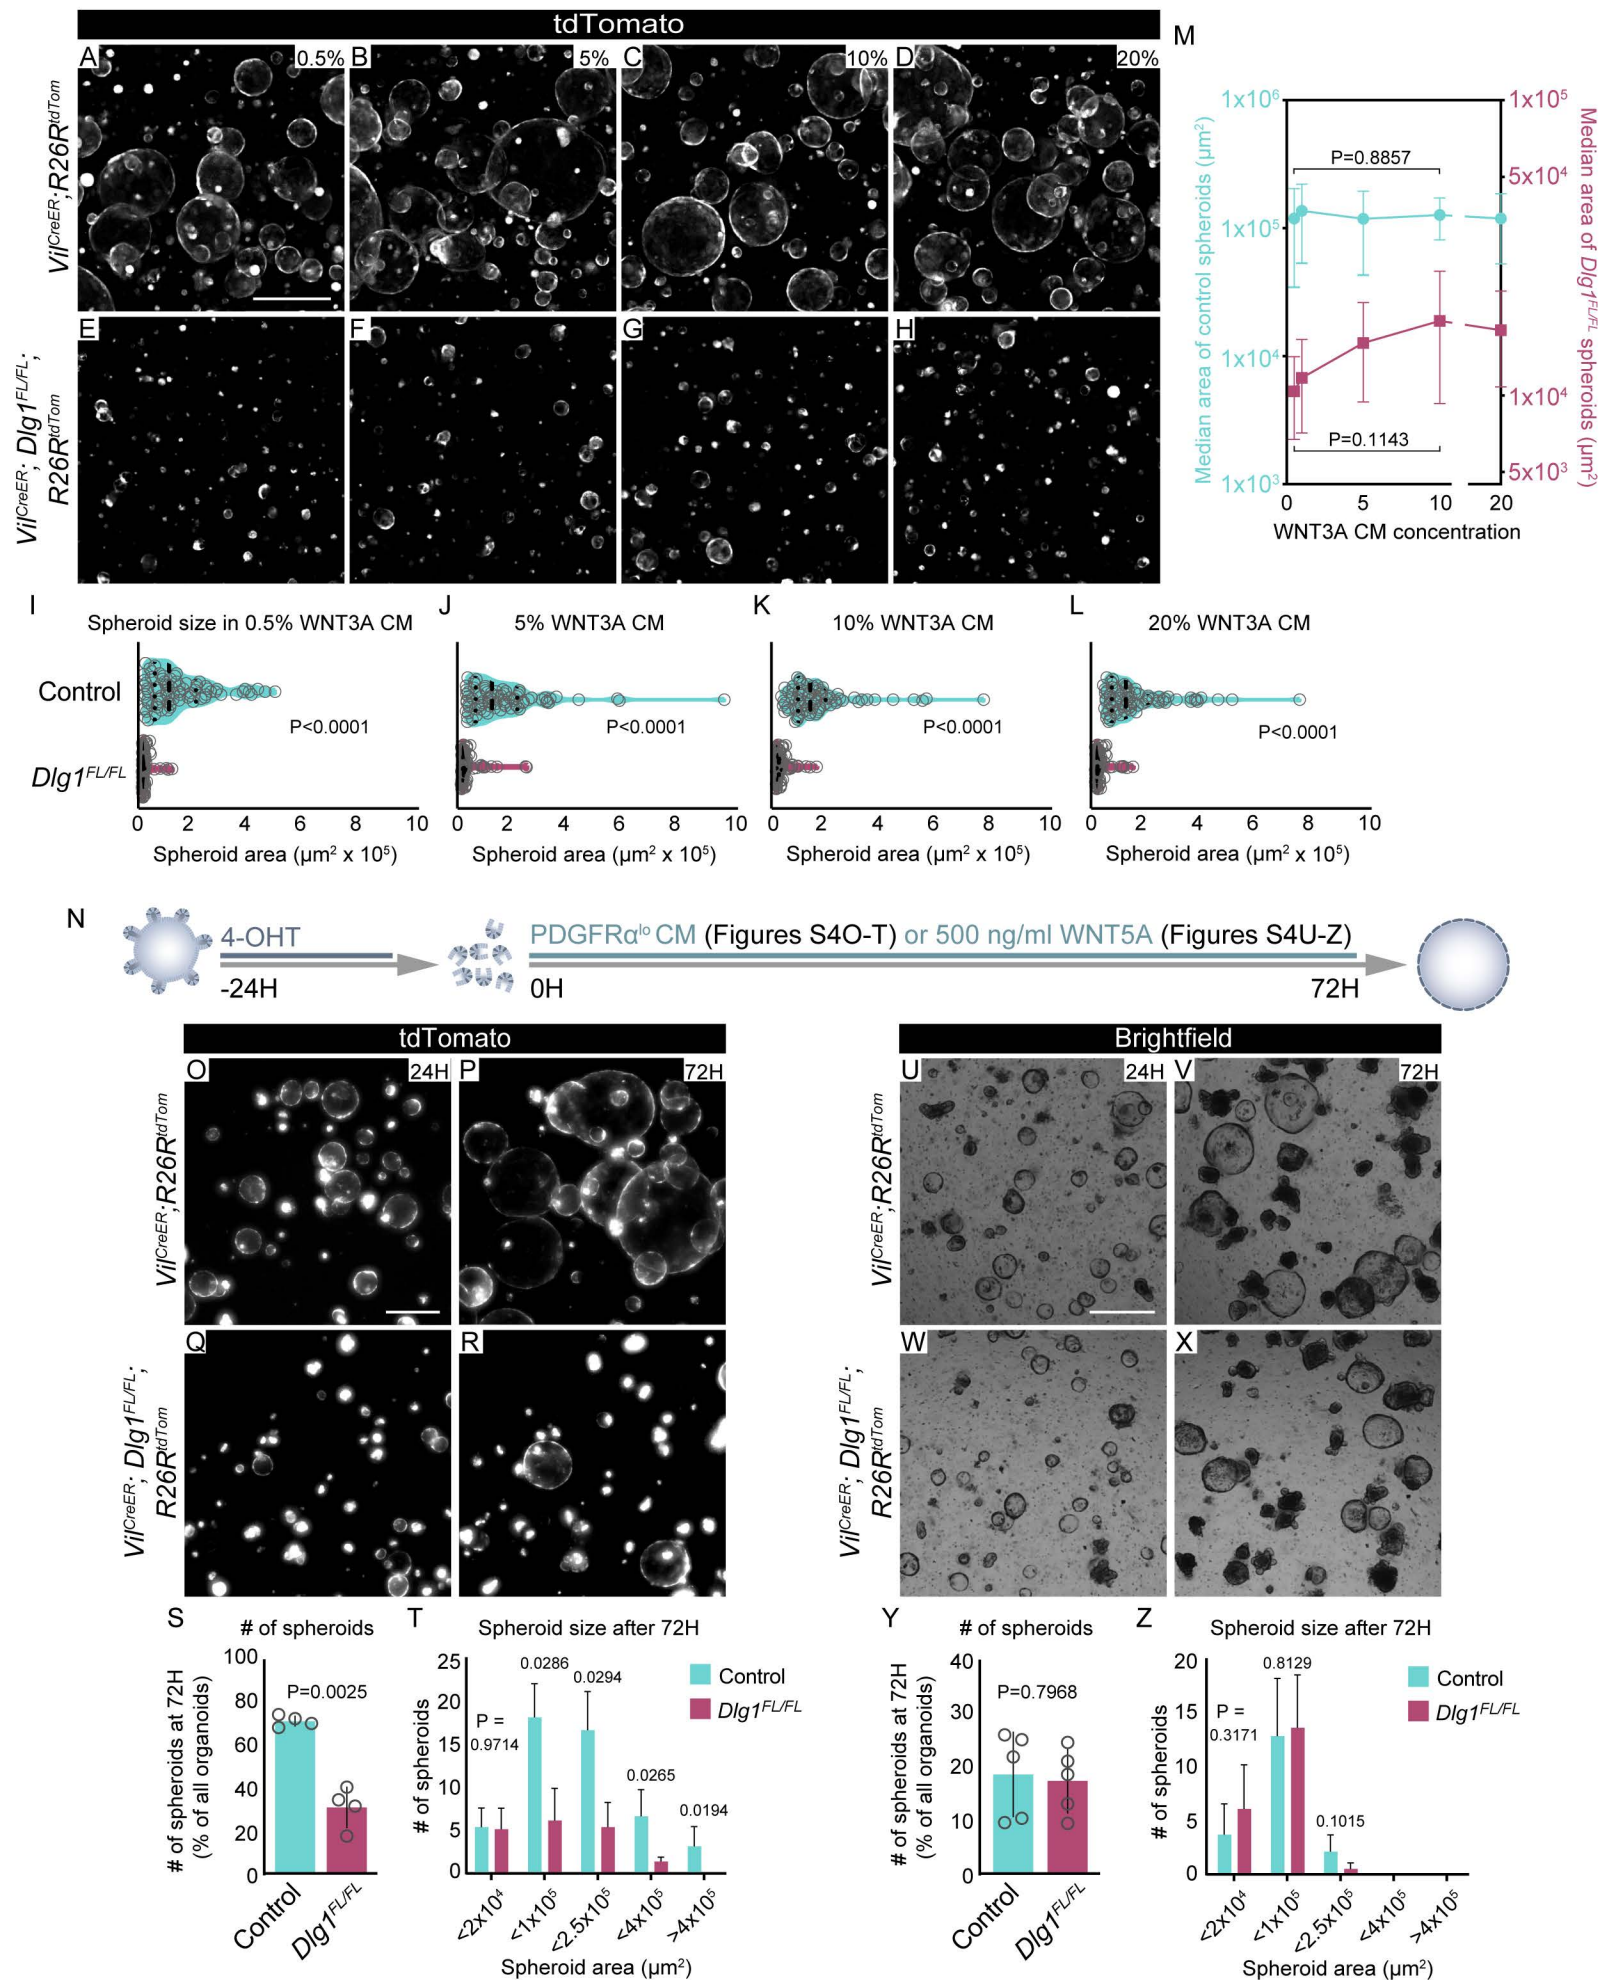

**Figure S4 (related to Figure 3). DLG1<sup>-</sup> ISCs are lost in increased levels of WNT3A and mesenchymal WNT, while their capacity to grow remains intact in non-canonical WNT5A.** Control and DLG1<sup>-</sup> organoids were enzymatically dissociated, plated into a Matrigel droplet and overlaid with ENR medium containing 4-OHT and WNT3A CM at different concentrations (for experimental details see Fig. 3A). **(A-H)** 3D rendered projection of organoids in **(A and E)** 0.5% WNT3A CM; **(B and F)** 5% WNT3A CM; **(C and G)** 10% WNT3A CM; and **(D and H)** 20% WNT3A CM. Scale bar = 500  $\mu$ m. **(I-L)** Quantification of spheroid size at 144 hours after plating. N = 4 x 20 top sized organoids, mean  $\pm$  SD, unpaired t test with Welch's correction. **(M)** Median spheroid size from (A-L) as a function of WNT3A CM concentration. N = 4 x 20 top sized organoids per condition, median  $\pm$  SD, unpaired t test with Welch's correction. **(N)** Experimental schematic for analyzing ISCs response to increased mesenchymal WNT levels or WNT5A. Control and DLG1<sup>-</sup> organoids were treated with 4-OHT prior mechanical passaging, crypts were plated into a Matrigel droplet and overlaid with ENR medium containing 50% PDGFR $\alpha^{\text{lo}}$  conditioned medium (PDGFR $\alpha^{\text{lo}}$  CM) or 500 ng/ml WNT5A. **(O-R)** 3D rendered Z-stack projections of spheroids at 24 **(O and Q)** or 72 **(P and R)** hours after plating in PDGFR $\alpha^{\text{lo}}$  CM. Scale bar = 500  $\mu$ m. **(S)** Quantification of formed spheroids in PDGFR $\alpha^{\text{lo}}$  CM as a ratio of all organoids at 72 hours after plating. N = 4 organoid lines per condition, mean  $\pm$  SD, unpaired t test with Welch's correction. **(T)** Quantification of spheroid size at 72 hours after plating. N = 4 organoid lines per condition, mean  $\pm$  SD, unpaired t test with Welch's correction. **(U-X)** 3D rendered Z-stack projections of spheroids at 24 **(U and W)** or 72 **(V and X)** hours after plating in WNT5A. Scale bar = 500  $\mu$ m. **(Y)** Quantification of formed spheroids in WNT5A as a ratio of all organoids at 72 hours after plating. N = 4 organoid lines per condition, mean  $\pm$  SD, unpaired t test with Welch's correction. **(Z)** Quantification of spheroid size at 72 hours after plating. N = 4 organoid lines per condition, mean  $\pm$  SD, unpaired t test with Welch's correction.



**Figure S5 (related to Figure 3). *Dlg1*<sup>-</sup> ISC are lost under homeostatic levels of WNT3A, while proliferation is maintained in increased WNT3A.**

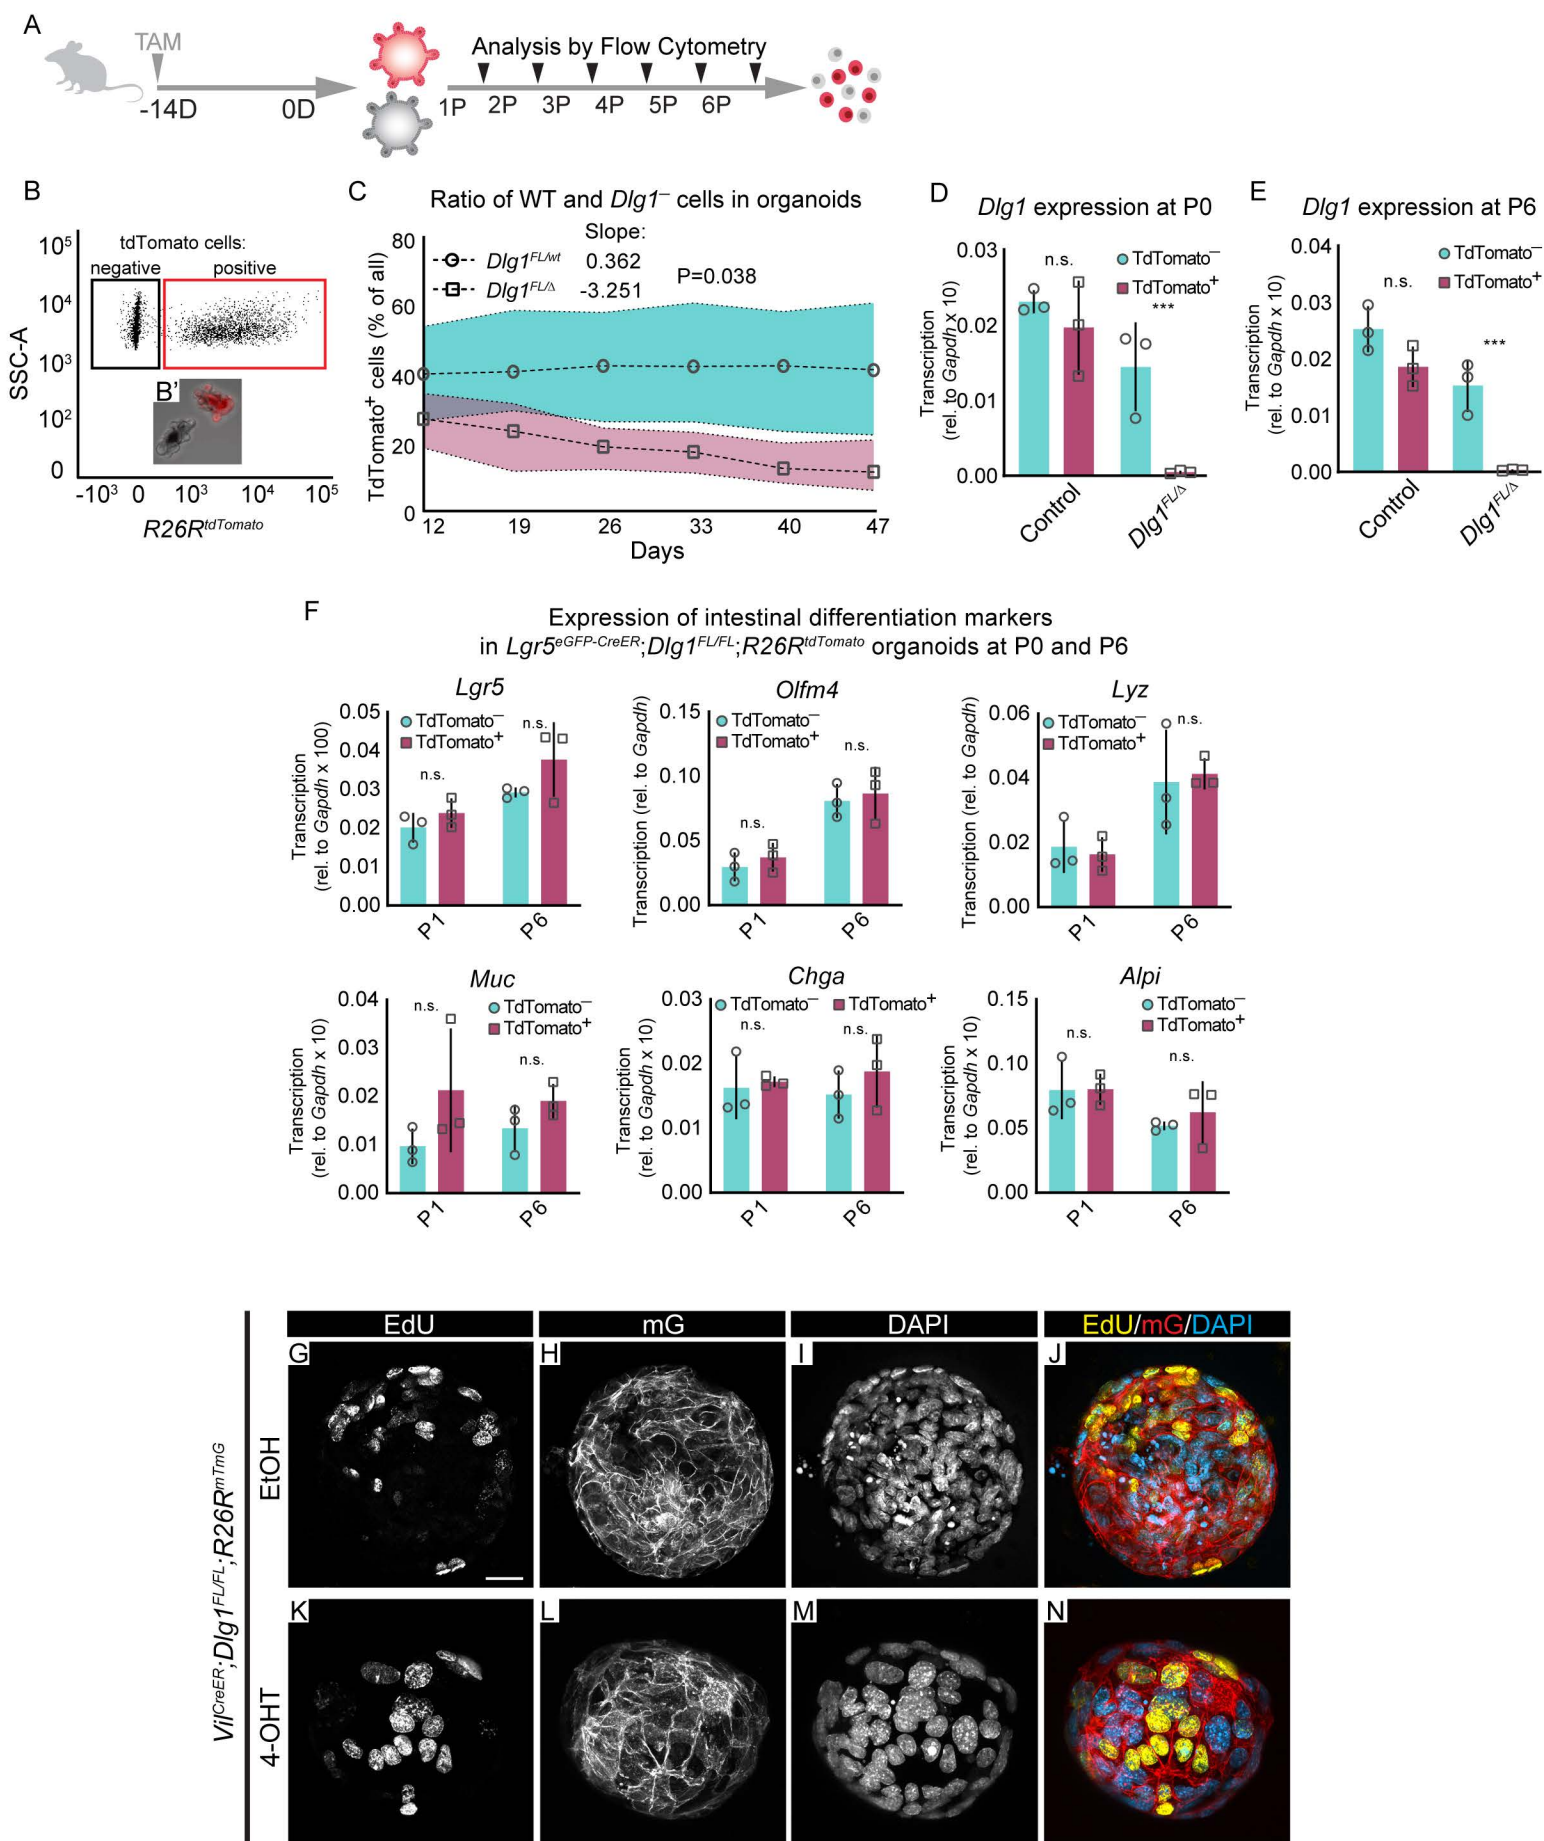

**Figure S5 (related to Figure 3). *Dlg1*<sup>-</sup> ISCs are lost under homeostatic levels of WNT3A, while proliferation is maintained in increased WNT3A. (A)** Experimental schematic for analyzing organoid persistence in ENR medium, in which Paneth cells are the only source of Wnt. Control and *Lgr5*<sup>eGFP-CreERT2</sup>;*Dlg1*<sup>FL/Δ</sup>;*R26R*<sup>tdTomato</sup> (*Dlg1*<sup>FL/Δ</sup>) mice were injected with 1 dose of TAM, and two weeks later organoids were established. Organoids were passaged every 7 days, and the ratio of tdTomato<sup>-</sup>/DLG1<sup>+</sup> and tdTomato<sup>+</sup>/DLG1<sup>-</sup> cells was analyzed at day 5 at every passage by flow cytometry. **(B)** Flow cytometry plot of *Dlg1*<sup>FL/Δ</sup> organoids with highlighted tdTomato<sup>-</sup> and tdTomato<sup>+</sup> cells in rectangles and **(B')** low resolution image of recombined (tdTomato<sup>+</sup>) and non-recombined (tdTomato<sup>-</sup>) organoid within the same Matrigel droplet. **(C)** Quantification of long-term persistence of tdTomato recombined organoids derived from control and *Dlg1*<sup>FL/Δ</sup> organoids as a ratio of all live cells. N = 6 organoid lines per condition, mean ± SD, simple linear regression. **(D and E)** Transcription levels of *Dlg1* analyzed by qPCR on FACS-sorted live (DAPI<sup>-</sup>) tdTomato<sup>-</sup> and tdTomato<sup>+</sup> organoids at **(D)** passage 0; and **(E)** passage 6. N = 3 organoid lines per condition, mean ± SD, unpaired t test with Welch's correction. **(F)** Transcription levels of intestinal cell-type specific markers analyzed by qPCR on FACS-sorted live (DAPI<sup>-</sup>) organoids established from *Lgr5*<sup>eGFP-CreERT2</sup>;*Dlg1*<sup>FL/Δ</sup>;*R26R*<sup>tdTomato</sup> mice. N = 3 organoid lines per condition, mean ± SD, unpaired t test with Welch's correction. **(G-N)** 3D rendered projection of organoid **(G and K)** stained with EdU; **(H and L)** expressing endogenous mG fluorescent protein; **(I and M)** stained with DAPI; and **(J and N)** multichannel overlay image composed of (P-R and T-V). Scale bar = 20 μm.

**Figure S6 (related to Figure 4). Under homeostatic conditions ARHGAP31<sup>-</sup> organoids grow at similar rate as control organoids.**

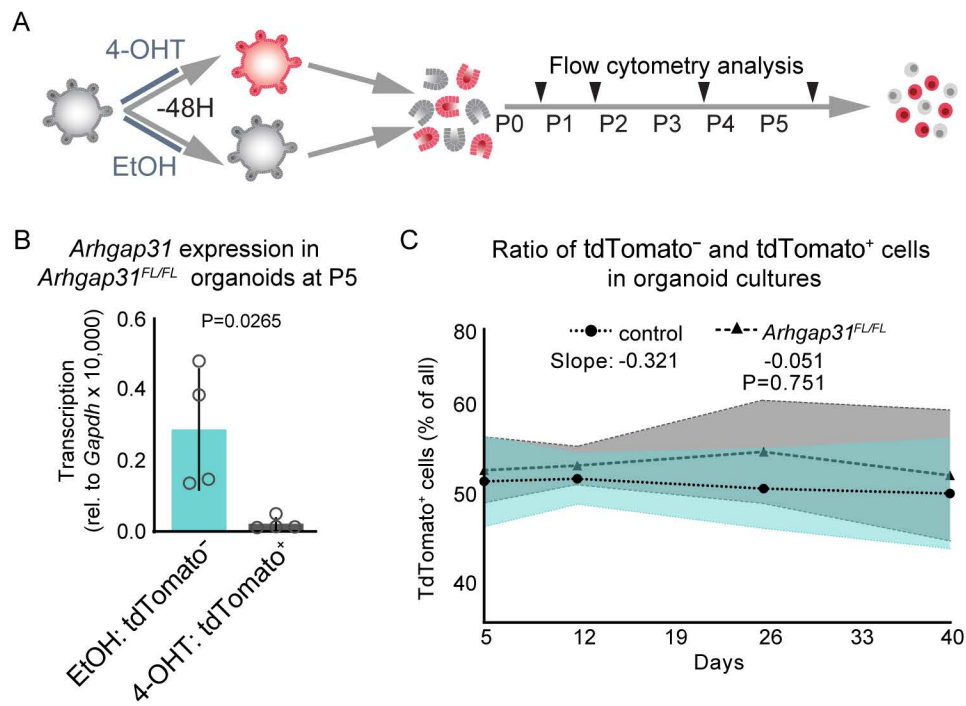

**Figure S6 (related to Figure 4). Under homeostatic conditions ARHGAP31<sup>-</sup> organoids grow at similar rate as control organoids.** (A) Experimental schematic for analyzing organoid persistence in ENR medium, in which Paneth cells are the only source of Wnt. Organoids from control, and *Arhgap31*<sup>FL/FL</sup> mice were treated with EtOH or 4-OHT for 48 hours, and mixed at 1:1 ratio while passaged at 1:1 ratio. Organoids were passaged every 7 days, and the ratio of tdTomato<sup>-</sup> (corresponding to non-recombined LoxP allele) and tdTomato<sup>+</sup> (corresponding to recombined LoxP allele) cells was analyzed at day 5 of passages P0, P1, P3 and P5 by flow cytometry. (B) Transcription levels of *Arhgap31* in *Arhgap31*<sup>FL/FL</sup> analyzed by qPCR on FACS-sorted live (DAPI<sup>-</sup>) tdTomato<sup>-</sup> (EtOH) and tdTomato<sup>+</sup> (4-OHT) organoids at passage 5. N = 4 organoid lines per condition, mean ± SD, unpaired t test with Welch's correction. (C) Quantification of long-term persistence of tdTomato recombined organoids derived from control, and *Arhgap31*<sup>FL/FL</sup> organoids as a ratio of all live (DAPI<sup>-</sup>) cells. N = 4 organoid lines per condition, mean ± SD, simple linear regression.

**Table S1 (related to STAR Methods). List of primers used for quantitative PCR.**

| <b>Gene name</b> | <b>IDT Identifier</b> | <b>Forward primer (5'-3' orientation)</b> | <b>Reverse primer (5'-3' orientation)</b> |
|------------------|-----------------------|-------------------------------------------|-------------------------------------------|
| <i>Alpi</i>      | Mm.PT.58.41550204     | GCTCAAAGAGGCCCATGA                        | ATGATCAGAACCTGGTGCAA                      |
| <i>Arhgap31</i>  | Mm.PT.58.29080273     | CTGACGGAGTATCTGGAAAGTTC                   | CGCTGGATGTTTGAGGTGAT                      |
| <i>Arhgap31</i>  | Mm.PT.58.14024919     | TCGAAGTCCAAGCTGAGTAGA                     | GAACACAGTGAGTCCATGCT                      |
| <i>Ascl2</i>     | Mm.PT.58.30838854     | GCTGCTTGACTTTTCCAGTTG                     | CACTAGACAGCATGGGTAAGG                     |
| <i>Axin2</i>     | Mm.PT.58.8726473      | AGTGTCTCTACCTCATTTTCCG                    | CTTCCAGCTCCAGTTTCCAGT                     |
| <i>Birc5</i>     | Mm.PT.58.33055871     | ATCTGCTTCTTGACAGTGAGG                     | CTGCTTTAAGGAATTGGAAGGC                    |
| <i>Chga</i>      | Mm.PT.58.29862516     | CGCTCCTTGGCACCTTG                         | TGTCAGCCCTGAGTGTCT                        |
| <i>Clca3</i>     | Mm.PT.58.9995580      | TGTAGCTTCAAACAGGTATGGA                    | CATCGTCATCGCCATTAGACC                     |
| <i>Cnx43</i>     | Mm.PT.58.5955325      | CCTTTGACTTCAGCCTCCAA                      | GACCTTGTCCAGCAGCTTC                       |
| <i>Dlg1</i>      | Mm.PT.58.11608658     | CACTGCTTTGAATGATCCACAC                    | GAAGTTCCATAGAGCGGGTTA                     |
| <i>Gapdh</i>     | Mm.PT.39a.1           | AATGGTGAAGGTCGGTGTG                       | GTGGAGTCATACTGGAACATGTAG                  |
| <i>Lgr4</i>      | Mm.PT.58.31320048     | CAGTACCCAGTGAAGCCATT                      | GTTGTCATCCAGCCACAGAT                      |
| <i>Lgr5</i>      | Mm.PT.53a.15747338    | CTCCAACCTCAGCGTCTTC                       | CATTTCCAGCAAGACGTAAGTC                    |
| <i>Lyz1</i>      | Mm.PT.58.7374112      | CCCAAGATCTAAGAATGCCTGT                    | CCCATGCTCGAATGCCTT                        |
| <i>Ly6a</i>      | Mm.PT.58.49069476     | GATGGACACTTCTCACACTACA                    | GCAGGTAATTGATGGGCAAGA                     |
| <i>Muc2</i>      | Mm.PT.56a.42107820.g  | ACCACAATCTCTACTCCCATCT                    | TCCAGTCAGACCAAAAAGCAG                     |
| <i>Olfm4</i>     | Mm.PT.58.14228836     | ACACAGCTCACATCCTTTCTC                     | GATGCTGTCCTTCTCCATGAC                     |
| <i>Rps17</i>     | Mm.PT.56a             | GCCCTAGATCAGGAGATCATTG                    | ATGCCAACTGTAGGCTGAGTG                     |
| <i>Trop2</i>     | Mm.PT.58.12245282.g   | TCAACCACTCTGACCTAGACT                     | TGCCGAAGCTCTATCTGAATG                     |
